# Supplementary material
Source: publisher figshare collection journal article supplement (https://tandf.figshare.com/ndownloader/files/26674852)
Supplement: Supplementary file 1 [file 26674852]

## **Opposition in times of crisis: COVID-19 in parliamentary debates**

Tom Louwerse<sup>a\*</sup>, Ulrich Sieberer<sup>b</sup>, Or Tuttnauer<sup>c</sup> and Rudy B. Andeweg<sup>a</sup>

*<sup>a</sup>Institute of Political Science, Leiden University, Leiden, The Netherlands; <sup>b</sup>Department of Political Science, University of Bamberg, Bamberg, Germany; <sup>c</sup>Mannheimer Zentrum für Europäische Sozialforschung, Universität Mannheim, Mannheim, Germany*

## **Online Appendices**

### **Appendix A: List of debates included in the analysis**

We outline the selection of debates in each country below. As the four parliaments discussed COVID-19 related issues in somewhat different ways, we allowed for some variation between countries as to what type of debates were included. We generally preferred more general debates on the government's COVID-19 response to very specific debates, but these did not take place regularly in all countries. Overall, the debate selection for Germany and The Netherlands focuses mostly on these general debates, while for Israel and the United Kingdom, we include a number of more specific debates as well to arrive at an encompassing picture of opposition expressed sentiment in all four countries.

For the Netherlands, Germany and the United Kingdom we also coded one major pre-COVID-19 debate in order to establish a baseline for comparison. We selected the major political debate that was held before the COVID-19 crisis started, such as the debate held after the Queen's/King's speech (UK/NL) and the general debate on the Chancellor's budget (Germany). In Israel it was not possible to establish a meaningful baseline, as elections were held early March 2020 and the composition of government and opposition changed.

## Germany

In a first sweep, we identified all general debates on the COVID-19 pandemic in the Bundestag until summer recess on July 3 that were not tied to specific pieces of legislation (numbers 1, 2, 3, 5, 6 in the list below). These debates focused on the general approach of the government towards handling the crisis rather than on technical details.

In a second sweep, we added two debates on supplementary budgets that are a direct response to the immediate financial implications of the crisis (numbers 4 and 7). These debates were still on a rather general level and allow general conclusions on opposition sentiment towards the government. In addition, the Bundestag held many debates on specific pieces of legislation that dealt in one way or another with the pandemic and its consequences. However, many of these debates was less concerned with government policy in general but often focused on specific and technical issues of the legislative proposal.

| Date       | Debate Title                                                                                                                                        |
|------------|-----------------------------------------------------------------------------------------------------------------------------------------------------|
| 12/02/2020 | Topical Debate ( <i>Aktuelle Stunde</i> ): Prevention strategy for the coronavirus in Germany                                                       |
| 04/03/2020 | Government declaration ( <i>Regierungserklärung</i> ) delivered by Minister of Health Jens Spahn: Combatting the coronavirus SARS-CoV-2) in Germany |
| 25/03/2020 | Agreed debate ( <i>Vereinbarte Debatte</i> ): Handling of the corona crisis <sup>1</sup>                                                            |
| 25/03/2020 | Debate on the first supplementary budget                                                                                                            |
| 23/04/2020 | Government declaration ( <i>Regierungserklärung</i> ) delivered by Chancellor Angela Merkel: Handling of the corona crisis in Germany and Europe    |
| 27/05/2020 | Topical debate ( <i>Aktuelle Stunde</i> ): Supporting economic recovery after the corona crisis on all levels of the state                          |
| 02/06/2020 | Debate on the second supplementary budget                                                                                                           |

---

<sup>1</sup> Typically, this would have been a government declaration delivered by the Chancellor.

However, Chancellor Angela Merkel (CDU) was in domestic quarantine at the time because she had had contact with an infected person a few days before. Instead, Vice Chancellor and Minister of Finance Olaf Scholz (SPD) delivered a general speech on behalf of the government.

The pre-COVID-19 debate we coded for comparison, was:

| <b>Date</b> | <b>Debate Title</b>                                                              |
|-------------|----------------------------------------------------------------------------------|
| 11/09/2020  | Debate on the Budget 2020: Section of the Chancellor and the Chancellor's Office |

### *Israel*

Debates were selected that included the word “corona” (קורונה) in their title, including bills, motions to the agenda and motions of no-confidence. Additionally, debates were selected if the subject of the bill or motion to the agenda was clearly due to the pandemic (e.g. a special amendment to the Basic Law: State economy). One-minute speeches by relevant opposition members speaking about the pandemic were included between March 17<sup>th</sup> and April 1<sup>st</sup> – a period in which no substantive debates were held in the Knesset following the March 2<sup>nd</sup> elections. Finally, five debates in which less than three opposition parties participated were dropped.

| <b>Date</b> | <b>Debate Title</b>                                                                                                                                                                                                       |
|-------------|---------------------------------------------------------------------------------------------------------------------------------------------------------------------------------------------------------------------------|
| 17/03/2020  | One-minute speeches                                                                                                                                                                                                       |
| 23/03/2020  | One-minute speeches                                                                                                                                                                                                       |
| 24/03/2020  | One-minute speeches                                                                                                                                                                                                       |
| 01/04/2020  | One-minute speeches                                                                                                                                                                                                       |
| 06/04/2020  | Basic Law Bill: State Economy (Temporary Provision for 2020)                                                                                                                                                              |
| 06/04/2020  | Basic Law Bill: State Economy (Amendment No. 10 and Temporary Provision for 2020)                                                                                                                                         |
| 16/04/2020  | Criminal Procedure Bill (Enforcement Powers - Arrests) (Temporary Order - The New Corona Virus) (Suspicious Arrest in Prevention of Promoting Investigation), 5724-2020                                                   |
| 16/04/2020  | Criminal Procedure Bill (Enforcement Powers - Communications Data) (Temporary Order - The New Corona Virus) (Receipt of Location Data for the Purpose of Supervising Compliance with the Isolation Provisions), 5764-2020 |
| 20/04/2020  | Cleanliness Bill (Temporary Order - The New Corona Virus Bill) (Grant to Local Authorities), 5742-2020                                                                                                                    |
| 22/04/2020  | Cleanliness Bill (Temporary Order - The New Corona Virus Bill) (Grant to Local Authorities), 5742-2020                                                                                                                    |
| 30/04/2020  | Motions to the agenda: distance learning in schools during the Corona crisis                                                                                                                                              |

| <b>Date</b> | <b>Debate Title</b>                                                                                                                                                                                      |
|-------------|----------------------------------------------------------------------------------------------------------------------------------------------------------------------------------------------------------|
| 30/04/2020  | Motions to the agenda: immediate need to expand and amend the outline of self-employment assistance                                                                                                      |
| 25/05/2020  | Local Authorities Bill (Temporary Order - The New Corona Virus) (Holding a Council Meeting in a Visual Committee), 5764-2020                                                                             |
| 27/05/2020  | Motions to the agenda Refund for parents following the cancellation of trips to Poland                                                                                                                   |
| 27/05/2020  | Motions to the agenda The fear of the collapse of businesses in areas where they did not return to activity in accordance with the provisions and the need for an additional grant for the self-employed |
| 27/05/2020  | Motions to the agenda to prevent double benefits from the National Insurance Institute for underprivileged populations                                                                                   |
| 27/05/2020  | Motions to the agenda Remaining unemployed - unemployed who will not return to work after the corona crisis has passed                                                                                   |
| 27/05/2020  | Basic Law Bill: State Economy (Amendment No. 10 and Temporary Provision for 2020) (Amendment)                                                                                                            |
| 01/06/2020  | Employment Encouragement Grant Bill (Temporary Order - The New Corona Virus), 2020                                                                                                                       |
| 01/06/2020  | Aviation Services Bill (Compensation and assistance due to cancellation or change in its terms) (Temporary Order - The New Corona Virus), 2020                                                           |
| 01/06/2020  | Basic Law Bill: State Economy (Amendment No. 10 and Temporary Provision for 2020) (Amendment)                                                                                                            |
| 03/06/2020  | Motions to the agenda One in ten Israelis eats less                                                                                                                                                      |
| 03/06/2020  | Bill Extending Periods and Postponing Deadlines in Matters of Tax Procedures (Temporary Order - The New Corona Virus), 2020                                                                              |
| 03/06/2020  | Bill to streamline municipal enforcement and supervision in local authorities (Temporary Provision) (Amendment No. 5), 5764-2020                                                                         |
| 03/06/2020  | Bill on Conducting Hearings in Technological Means (Temporary Order - The New Corona Virus) (Judgments in Courts and Courts with the Participation of Detainees, Prisoners and Prisoners), 5724-2020     |
| 03/06/2020  | Urgent queries - Dealing with the crisis in the fishing industry                                                                                                                                         |
| 15/06/2020  | Motion of no-confidence due to the failure to combat the Coronavirus                                                                                                                                     |
| 15/06/2020  | Bill to extend the validity of emergency regulations (the new corona virus - enforcement), 2020                                                                                                          |
| 15/06/2020  | Bill to streamline municipal enforcement and supervision in local authorities (Temporary Provision) (Amendment No. 5), 5764-2020                                                                         |
| 15/06/2020  | Bill to amend the Municipalities Ordinance (Temporary Order) (Amendment No. 5), 5764-2020                                                                                                                |
| 15/06/2020  | Bill Preventing the entry of visitors and lawyers to places of detention, police stations, prisons, guard rooms and military prisons (Temporary Order), 5724-2020                                        |
| 15/06/2020  | Employment Encouragement Grant Bill (Temporary Order - The New Corona Virus), 2020                                                                                                                       |
| 15/06/2020  | Special Powers Bill for Dealing with the New Corona Virus (Temporary Order), 2020                                                                                                                        |
| 17/06/2020  | Motions to the agenda: Non-return of the Israel Railways to routine                                                                                                                                      |
| 17/06/2020  | Motions to the agenda: Discrimination and the lack of an outline for summer camps in non-formal educational institutions                                                                                 |
| 17/06/2020  | Motions to the agenda: Fear of economic collapse of government and public                                                                                                                                |

| <b>Date</b> | <b>Debate Title</b>                                                                                                                                                                                                            |
|-------------|--------------------------------------------------------------------------------------------------------------------------------------------------------------------------------------------------------------------------------|
|             | hospitals as a result of loss of revenue during the Corona period                                                                                                                                                              |
| 22/06/2020  | Bill Extending and Postponing Deadlines (Temporary Order - New Corona Virus) (Regulatory Approvals and Financial Sanctions), 2020                                                                                              |
| 22/06/2020  | Bill to extend the validity of Emergency Regulations (New Corona Virus) (Restricted Area), 2020                                                                                                                                |
| 22/06/2020  | Bill to extend the validity of emergency regulations (the new corona virus) (isolation instead of isolation on behalf of the state), 5722-2020                                                                                 |
| 22/06/2020  | Bill to extend the validity of emergency regulations (the new Corona virus - restriction of activity), 2020                                                                                                                    |
| 22/06/2020  | Special Adaptation Grant Bill for People Aged 67 and Over (Temporary Order - The New Corona Virus), 2020                                                                                                                       |
| 22/06/2020  | Bill Special powers to deal with the new corona virus (isolation instead of isolation on behalf of the state and administrative closure orders) (Temporary Order), 5722-2020                                                   |
| 22/06/2020  | Bill on the Absorption of Veterans (Temporary Order - The New Corona Virus) (Implementation of Part of the Deposit for Any Purpose), 5764-2020                                                                                 |
| 24/06/2020  | Motions to the agenda - industries that are severely affected in May-July as a result of state directives                                                                                                                      |
| 24/06/2020  | Motions to the agenda - warning the employment service of a significant increase in unemployment, especially among young people, the elderly and minorities in society                                                         |
| 24/06/2020  | General Security Service Accreditation Bill to Assist in the National Effort to Reduce the Spread of the New Corona Virus (Temporary Order), 2020                                                                              |
| 29/06/2020  | No-confidence motion: Government failure to address Corona                                                                                                                                                                     |
| 29/06/2020  | Proposal of the Foreign Affairs and Defense Committee on the Split of the General Security Service Accreditation Bill to Assist in the National Effort to Reduce the Spread of the New Corona Virus (Temporary Order), 5752-20 |
| 29/06/2020  | Period Extension Bill (Temporary Order - The New Corona Virus) (Regulatory Approvals), 5764-2020                                                                                                                               |
| 29/06/2020  | National Insurance Bill (Temporary Order - The New Corona Virus) (Special Provisions Regarding Unemployment Insurance), 2020                                                                                                   |
| 29/06/2020  | Bill to amend and enforce emergency regulations (New Corona virus - enforcement) (Amendment), 5742-2020                                                                                                                        |
| 29/06/2020  | Bill on the Conduct of Discussions of the Release Committees and the Committee for the Examination of Punishment (Temporary Order - The New Corona Virus), 5702                                                                |
| 01/07/2020  | General Security Service Accreditation Bill to Assist in the National Effort to Reduce the Spread of the New Corona Virus (Temporary Order), 2020                                                                              |
| 01/07/2020  | Bill to amend and extend the validity of Emergency Regulations (New Corona Virus) (Restricted Area), 2020                                                                                                                      |
| 01/07/2020  | Bill to amend and extend the validity of emergency regulations (the new corona virus) (isolation instead of isolation on behalf of the state), 5722-2020                                                                       |
| 01/07/2020  | Real Estate Taxation (Appreciation and Acquisition) Bill (Amendment - Extension of the Period for the Exchange of an Apartment Due to the Corona Crisis), 5764-2020                                                            |

### *The Netherlands*

Between 5 March and the 2020 summer recess the Dutch lower house (*Tweede Kamer*) discussed the Coronavirus situation in a series of general Coronavirus debates, each entitled ‘the situation regarding the coronavirus’. As these debates were held at regular intervals we selected only those debates, discarding for example a debate on the economic aid package held at the end of May 2020. A committee debate was held on 6 February 2020 well before the first plenary debate. We ultimately decided against including this, as we would not be able to ascertain whether any differences between this committee debate and the other debates were due to the timing or the setting (committee vs. plenary) of the debate.

| Date       | Debate Title                                                    |
|------------|-----------------------------------------------------------------|
| 05/03/2020 | Debate on the developments regard the spread of the coronavirus |
| 12/03/2020 | Debate on the fight against the coronavirus                     |
| 18/03/2020 | Debate on the current developments regarding the coronavirus    |
| 26/03/2020 | Debate on the current developments regarding the coronavirus    |
| 01/04/2020 | Debate on the developments regarding the coronavirus            |
| 08/04/2020 | Debate on the developments regarding the coronavirus            |
| 16/04/2020 | Debate on the developments regarding the coronavirus            |
| 22/04/2020 | Debate on the developments regarding the coronavirus            |
| 07/05/2020 | Debate on the developments regarding the coronavirus            |
| 20/05/2020 | Debate on the developments regarding the coronavirus            |
| 04/06/2020 | Debate on the developments regarding the coronavirus            |
| 25/06/2020 | Debate on the developments regarding the coronavirus            |

The pre-COVID-19 debate we coded for comparison, was:

| Date       | Debate Title                                                              |
|------------|---------------------------------------------------------------------------|
| 18/09/2020 | General political reflections ( <i>Algemene Politieke Beschouwingen</i> ) |

### *United Kingdom*

Using Hansard’s records of debates in the House of Commons made available on the website [www.theyworkforyou.com](http://www.theyworkforyou.com), we identified all debates with either ‘coronavirus’

or ‘covid-19’ in the major heading. There are several hundreds of debates in which these terms occur in MPs’ contributions, but often in a context in which the main focus of the debate was not on the crisis. Most of the 39 selected debates concerned the government’s general handling of the crisis, and not on very specific aspects, but the distinction is not always clear-cut, such as in a debate on the fate of UK nationals held in corona-infected prisons abroad. Most of the debates are either adjournment debates or emergency debates on an urgent question by an MP. Only two debates, both on March 23, dealt with legislation.

| <b>Date</b> | <b>Debate Title</b>                                  |
|-------------|------------------------------------------------------|
| 23/01/2020  | Wuhan Coronavirus                                    |
| 03/02/2020  | Wuhan Coronavirus                                    |
| 11/02/2020  | Wuhan Coronavirus                                    |
| 26/02/2020  | Coronavirus                                          |
| 02/03/2020  | British Citizens Imprisoned Overseas and Coronavirus |
| 03/03/2020  | Coronavirus                                          |
| 09/03/2020  | Coronavirus                                          |
| 11/03/2020  | Coronavirus                                          |
| 16/03/2020  | COVID-19                                             |
| 17/03/2020  | COVID-19                                             |
| 19/03/2020  | Coronavirus: Employment Support                      |
| 23/03/2020  | Coronavirus Bill                                     |
| 24/03/2020  | COVID-19 Update                                      |
| 22/04/2020  | COVID-19 Response                                    |
| 29/04/2020  | COVID-19: Repatriation of UK Nationals               |
| 04/05/2020  | COVID-19: DWP Update                                 |
| 05/05/2020  | COVID-19 Update                                      |
| 06/05/2020  | COVID-19: International Response                     |
| 11/05/2020  | COVID-19: Strategy                                   |
| 11/05/2020  | COVID-19                                             |
| 12/05/2020  | COVID-19: Economic Package                           |
| 12/05/2020  | COVID-19: Business                                   |
| 12/05/2020  | COVID-19: Transport                                  |
| 12/05/2020  | COVID-19                                             |
| 13/05/2020  | COVID-19: School Reopening                           |
| 13/05/2020  | COVID-19: Housing Market                             |
| 18/05/2020  | COVID-19 Response                                    |
| 19/05/2020  | Coronavirus and Care Homes                           |

| <b>Date</b> | <b>Debate Title</b>                                |
|-------------|----------------------------------------------------|
| 02/06/2020  | COVID-19 Response                                  |
| 03/06/2020  | COVID-19: Aviation                                 |
| 03/06/2020  | COVID-19: UK Border Health Measures                |
| 04/06/2020  | Public Health England Review: COVID-19 Disparities |
| 08/06/2020  | COVID-19: R Rate and Lockdown Measures             |
| 17/06/2020  | Coronavirus                                        |
| 17/06/2020  | COVID-19: Asylum Seeker Services in Glasgow        |
| 18/06/2020  | COVID-19: BAME Communities                         |
| 23/06/2020  | COVID-19 Update                                    |
| 25/06/2020  | COVID-19: Support for UK Industries                |

The pre-COVID-19 debate we coded for comparison, was:

| <b>Date</b> | <b>Debate Title</b>   |
|-------------|-----------------------|
| 19/12/2020  | Debate on the Address |



## **Appendix B: Coding instructions for Opposition Party Expressed Sentiment Scale**

The scale consists of 5 categories: High/moderate negativity, neutral, and moderate/high positivity.

The unit of analysis is a speech act, a section of the text dedicated to one topic/message. This will normally, but not always, be a single paragraph in a parliamentary speech. If need be, paragraphs can be split into distinct speech acts. Interruptions – in parliaments in which they occur and are documented – may also constitute a speech act.

We code in two steps:

- Step 1: Decide whether a statement is negative, neutral, positive or cannot be coded on the oppositional attitude scale (missing).
- Step 2: When a statement is negative or positive, decide whether it is highly or moderately so. This we regard as a difference in intensity of the remark.

### ***Negative***

Negative statements meet one of the below descriptions:

- (1) Is the speaker critiquing a specific measure or the government's policy agenda as a whole? e.g. "Lockdown is a mistake" / "small businesses are left behind"
- (2) Is the speaker promising to handle the situation, insinuating they will do better than the government?
- (3) Is the speaker calling for a government action that (s)he argues is not currently taken by the government? (the call for action implies a critique on current policies/measures)

- (4) The speaker expresses regret for the government not taking up an opposition proposal/suggestion.

Code as high negativity (-2) if the speaker goes beyond what is deemed normal criticism of the government, for example by using blunt, severe language, offering a sweeping critique of government policy, criticizing the minister personally, or asking for a resignation of a minister/the government as a whole.

Code as moderate negativity (-1) if the speaker offers what is deemed normal criticism of the government.

### ***Neutral***

The following type of statements are coded as neutral (0):

- (1) Is the speaker mentioning government policies/actions/measures or asking questions/making suggestions without any obvious judgement or negative/positive sentiment vis-à-vis the government?
- (2) Is the speaker asking the government for information about a particular policy/situation (without implying criticism or support for the government)?

[Note: compare to coding as missing]

### ***Positive***

Positive statements meet one of the below descriptions:

- (1) Is the speaker offering support for government actions/policies? e.g. “we will support any correct measures by the government”
- (2) Is the speaker calling citizens to abide by government guidelines?

- (3) Is the speaker promising/stating cooperation with the government on a specific action? e.g. voting for a specific government bill
- (4) Is the speaker acknowledging that the government has included an opposition proposal in their policies?
- (5) Is the speaker calling government parties to join an emergency government?

Code as high positivity (+2) if the speaker not only mentions the government's policies or actions in a positive way, but does so in a clearly very positive way (beyond what is deemed normal) and/or clearly credits the government for their actions.

Code as moderate positivity (+1) otherwise. Remarks in this category will normally mention support for government action, but not clear praise (or rather stress the role of their own party in bringing about cooperation between government and opposition).

### ***Missing (Not Applicable/NA)***

In general we code statements that (implicitly or explicitly) relate to policies or actions of the government/government ministers/government parties. Other statements should be coded as missing (NA), for example:

- (1) Any technical language/point of order ('my microphone is not on').
- (2) Is the speaker giving a statement without connection to government policies/measures/ action? e.g. "we will get through this", "I admire the health workers"
- (3) Is the speaker addressing other opposition parties' policy positions (not the government's) and does this message not clearly imply critique on or support for the government's policies?

- (4) Does the speaker mention general policy positions or future policy goals that do not clearly relate to the topic of the debate and/or government policy? (i.e. talking about the need for a ‘green economic recovery’ after the COVID-19 crisis).
- (5) When in doubt about whether a statement relates to government policy/action, code as missing.

### *Examples of coded paragraphs*

Note: These paragraphs have been translated from the original language by the authors.

| Code | Country | Example of coded paragraph                                                                                                                                                                                                                                                                                                                                                                                                                                                                                                                                                                                                                                                                                                                                                                   |
|------|---------|----------------------------------------------------------------------------------------------------------------------------------------------------------------------------------------------------------------------------------------------------------------------------------------------------------------------------------------------------------------------------------------------------------------------------------------------------------------------------------------------------------------------------------------------------------------------------------------------------------------------------------------------------------------------------------------------------------------------------------------------------------------------------------------------|
| -2   | NL      | It is too little and it is too late. For weeks, this cabinet underestimated the coronavirus. While countries around us intervened hard, the problems in the Netherlands were denied. For weeks, the Dutch Party for Freedom (PVV) has been crying out for decisiveness, but apart from measures in Brabant, the government only came up with a recommendation not to shake hands. There was hardly any intervention, because the problems were denied and trivialised. Minister Bruins said in January of this year that the chances of the virus crossing from Asia to Europe were slim. And Minister Bruins wrote to the House in a letter on 25 February that he considered the chance of the virus manifesting itself in the Netherlands small. He was completely wrong. What a blunder! |
| -2   | UK      | I am sorry but the Minister is talking absolute crap!                                                                                                                                                                                                                                                                                                                                                                                                                                                                                                                                                                                                                                                                                                                                        |
| -2   | GER     | Finally restore the constitutional order in this country and give their freedom back to the people!                                                                                                                                                                                                                                                                                                                                                                                                                                                                                                                                                                                                                                                                                          |
| -2   | ISR     | People have no money to go to the grocery store, what exactly are you doing, what do you want to achieve? You have increased the fines because you are hard of heart and have no God. Shame on you.                                                                                                                                                                                                                                                                                                                                                                                                                                                                                                                                                                                          |
| -1   | NL      | At the same time, I would like to say to my fellow Members that, at this stage too, communication is very important. There is still a long way to go in explaining the reasons why, the background to the measures, but also in terms of content - you immediately saw all kinds of questions arise in all kinds of areas.                                                                                                                                                                                                                                                                                                                                                                                                                                                                   |
| -1   | UK      | It is now six and a half weeks since the first cases of coronavirus were reported in the UK. For over a month we have known about the substantial risk that coronavirus poses to the economy and to workers, yet the Government have announced no plan to protect jobs and wages - no full plan for employment support. We are all -all of us- inundated with so many questions, and I have just four of those questions to ask.                                                                                                                                                                                                                                                                                                                                                             |
| -1   | GER     | The federal government has done too little and does too little to                                                                                                                                                                                                                                                                                                                                                                                                                                                                                                                                                                                                                                                                                                                            |

| Code | Country | Example of coded paragraph                                                                                                                                                                                                                                                                                                                                                                                                                                                                                                       |
|------|---------|----------------------------------------------------------------------------------------------------------------------------------------------------------------------------------------------------------------------------------------------------------------------------------------------------------------------------------------------------------------------------------------------------------------------------------------------------------------------------------------------------------------------------------|
|      |         | counter this scaremongering by the media.                                                                                                                                                                                                                                                                                                                                                                                                                                                                                        |
| -1   | ISR     | Therefore, Mr. Chairman, we will oppose this law in principle and in substance, we will oppose it because it does not give an adequate answer to the issue we are discussing today.                                                                                                                                                                                                                                                                                                                                              |
| 0    | NL      | And, finally. In your letter, you write that 30 million mouth caps have been ordered. Is this enough? Approximately how many mouth caps are needed per day in healthcare? Ideally, how many should also be available outside of the health care sector?                                                                                                                                                                                                                                                                          |
| 0    | UK      | In answering my right hon. Friend the Member for Leeds Central (Hilary Benn) earlier, the Secretary of State made it clear that he wanted everybody to be tested at home if they had the symptoms. What is the difference between the number of new cases currently and the number of tests that are currently available per day?                                                                                                                                                                                                |
| 0    | GER     | Now is the hour of the state. We need the state in everything that goes beyond the individual's ability to take responsibility. This is exactly the situation in which we find ourselves now where we have to use the state's capabilities to use all the funds it has at its disposal.                                                                                                                                                                                                                                          |
| 0    | ISR     | I suggest you, Honourable Deputy Minister, to meet the members of the Joint List within a day or two so that we can present to you all these things -- in order to move forward in a comprehensive way.                                                                                                                                                                                                                                                                                                                          |
| 1    | NL      | It is nice to hear that the VVD is also moving a little towards the fact that it is very important to be able to impose conditions.                                                                                                                                                                                                                                                                                                                                                                                              |
| 1    | UK      | The right hon. Lady is making a fine speech. I welcome the support that the Government have put in.                                                                                                                                                                                                                                                                                                                                                                                                                              |
| 1    | GER     | I want to compliment the Minister of Health for not leaving out the critical points and for naming the weaknesses.                                                                                                                                                                                                                                                                                                                                                                                                               |
| 1    | ISR     | At this time, increasing the deficit is a necessity, and of course we support it – here you go, Mr. Deputy Minister.                                                                                                                                                                                                                                                                                                                                                                                                             |
| 2    | NL      | All the more reason to thank all those who - Jesse Klaver said that, rightly so, sometimes work with personal courage and take risks to protect us. My thanks also go to the people in section K [government seating area in parliament] who are fighting the crisis. In this case, I would like to mention Bruno Bruins, who had to resign because he collapsed under the burden of the crisis.                                                                                                                                 |
| 2    | UK      | I will not be moving my amendment, but instead thank the Government for their amendment, which actually strengthened my proposal. However, it is still important to say a few words about that. I have been truly heartened by the cross-party support that I have received in this process from every part of this House. It really does demonstrate how, at times of crisis, democracy can work and can respond positively to the concerns out there in the community. I would like to say thank you for that spirit of unity. |
| 2    | GER     | In these times, government and opposition bear a joint responsibility for the state. Those who hold the opposition role in the German Bundestag also bear executive responsibility on the subnational and local level. This is why we had intense consultations. I explicitly want to thank the Federal Government and the party groups supporting it for the constructive atmosphere, in which we have discussed the issues that are to be decided today.                                                                       |

| <b>Code</b> | <b>Country</b> | <b>Example of coded paragraph</b>                                                                                                                                                                                                                                                  |
|-------------|----------------|------------------------------------------------------------------------------------------------------------------------------------------------------------------------------------------------------------------------------------------------------------------------------------|
| 2           | ISR            | It succeeded in part because of your participation and your arrival [Honourable Minister]. It is important for to be known that when a minister comes to the committee, it is easier to coordinate legislation. I think your presence, on a personal level, has been very helpful. |

## **Appendix C: Inter-coder reliability tests**

The coding scale requires coders to evaluate statements, rather than purely factual information. It is not always straightforward to distinguish between very and moderately negative statements, nor is it always clear whether a question to a minister implies a criticism or truly represents a demand for information. Therefore, one of the authors and a student assistant double coded at least one debate in each country. We performed one or two test rounds in each country, after which we discussed coding differences and clarified coding instructions. In final inter-coder reliability tests, we obtained values of Krippendorff's alpha (interval) of 0.84 (Netherlands,  $N_{\text{coding units}} = 197$ ), 0.81 (United Kingdom,  $N_{\text{coding units}} = 469$ ), 0.77 (Israel,  $N_{\text{coding units}} = 159$ ) and 0.87 (Germany,  $N_{\text{coding units}} = 157$ ). When we calculate the parties' mean scale position in a debate and correlate these scores between coders, we obtain a Pearson's correlation of 0.93 (Netherlands), 0.88 (United Kingdom), 0.94 (Israel) and 0.94 (Germany), which shows that coding differences between individual coders on the paragraph level nevertheless results in highly correlated estimates of party positions in debates.

## Appendix D: Descriptive statistics

**Table A.1: Country-level descriptive statistics about coded speeches**

| Country        | Debates | Total speech acts | Total speech acts coded -2 to +2 | Unique speakers |
|----------------|---------|-------------------|----------------------------------|-----------------|
| Germany        | 7       | 824               | 327                              | 26              |
| Israel         | 56      | 979               | 652                              | 48              |
| Netherlands    | 12      | 3151              | 2157                             | 20              |
| United Kingdom | 38      | 1384              | 1106                             | 133             |

**Table A.2: Party level descriptive statistics about coded speeches**

| Country         | Party                        | Mean number of words spoken per day |
|-----------------|------------------------------|-------------------------------------|
| Germany         | FDP                          | 1331                                |
|                 | Greens                       | 1389                                |
|                 | Left                         | 1200                                |
|                 | AfD                          | 1599                                |
| Israel          | Blue-White                   | 358                                 |
|                 | Israel Our Home              | 1698                                |
|                 | Labor                        | 598                                 |
|                 | Meretz                       | 731                                 |
|                 | Joint List                   | 1337                                |
|                 | Yesh Atid                    | 1337                                |
|                 | Yemina                       | 2262                                |
|                 | 50 PLUS                      | 1126                                |
| The Netherlands | DENK                         | 1682                                |
|                 | Forum for Democracy          | 1852                                |
|                 | GroenLinks (GreenLeft)       | 3063                                |
|                 | PvdA (Labour Party)          | 2689                                |
|                 | PvdD (Party for the Animals) | 2465                                |
|                 | PVV                          | 4383                                |
|                 | SGP                          | 1521                                |
|                 | SP                           | 3221                                |
|                 | DUP                          | 265                                 |
|                 | Labour                       | 2214                                |
| United Kingdom  | Liberal Democrat             | 431                                 |
|                 | Plaid Cymru                  | 136                                 |
|                 | Scottish National Party      | 994                                 |

*Note: Mean number of words spoken in COVID-19 debates on a particular day and the party was represented in parliament.*



## Appendix E: Additional regression analyses

Models 1 and 2 in Table A.3 include populism as a scale and binary classification respectively. The scale variable is derived from Norris (2019) and the binary classification is based on the Popu-List (Rooduijn et al., 2019); for Israel we classified Israel Our Home as populist. We find a significant negative coefficient for the binary populism variable (Model 2): these parties are expected to score -0.294 points lower than non-populist parties (*ceteris paribus*).

Models 3 to 5 add the measures of crisis severity separately to assess whether their correlation affects the findings. This is not substantially the case: we only find a significant effect for ‘daily deaths’ that is not significant in model 2 in the main analysis. As with the stringency index, the relationship is negative: more deaths are related to more negative opposition party sentiment, which we relate to the timing: the death toll was relatively low very early in the crisis (when sentiment was positive), but while sentiment started to turn negative, the death toll remained at relatively high levels in May/June.

Table A.4 presents the results of a multilevel regression analysis. Here the unit of analysis is one coded speech act (paragraph). We include speaker and party as random intercepts. We include two speech act-level covariates: a dummy variable for whether a speech act is an interruption as well as the length of the speech act in words (both are statistically significant). We report the model without the country fixed effects here, because this variation is already picked up by the party random intercepts and a model that does include these country dummy variables performs worse: the country dummies are not significant, a likelihood ratio test shows no significant improvement and the AIC and BIC are worse. The findings on the independent variables of interests are not substantively different from those reported in the main analysis. We also ran an

ordinal logistic model with the same specification (not reported), which provided very similar findings.

**Table A.3: Additional regression models**

|                                 | (1)<br>Populism<br>scale | (2)<br>Populism<br>binary | (3)<br>Daily cases   | (4)<br>Daily<br>deaths | (5)<br>Stringency    |
|---------------------------------|--------------------------|---------------------------|----------------------|------------------------|----------------------|
| Date                            | -0.255***<br>(0.050)     | -0.238***<br>(0.047)      |                      |                        |                      |
| Date^2                          | 0.009<br>(0.037)         | 0.001<br>(0.037)          |                      |                        |                      |
| Daily cases / 1mil              | 0.001<br>(0.002)         | 0.001<br>(0.002)          | -0.001<br>(0.001)    |                        |                      |
| Daily deaths / 1mil             | 0.001<br>(0.004)         | 0.001<br>(0.004)          |                      | -0.007**<br>(0.003)    |                      |
| Policy stringency               | 0.001<br>(0.002)         | 0.001<br>(0.002)          |                      |                        | -0.004***<br>(0.001) |
| Ideological distance            | -0.036<br>(0.031)        | -0.039<br>(0.025)         |                      |                        |                      |
| Populism scale                  | -0.013<br>(0.022)        |                           |                      |                        |                      |
| Populism binary                 |                          | -0.294***<br>(0.068)      |                      |                        |                      |
| Office experience               | -0.023<br>(0.017)        | -0.015<br>(0.010)         |                      |                        |                      |
| Party size                      | -0.039***<br>(0.013)     | -0.028***<br>(0.008)      |                      |                        |                      |
| Experience * Size               | 0.003**<br>(0.001)       | 0.002***<br>(0.001)       |                      |                        |                      |
| Country<br>(Ref. = Netherlands) |                          |                           |                      |                        |                      |
| Germany                         | 0.272**<br>(0.130)       | 0.315**<br>(0.132)        | 0.165<br>(0.181)     | 0.171<br>(0.179)       | 0.103<br>(0.180)     |
| United Kingdom                  | 0.207<br>(0.126)         | 0.179*<br>(0.101)         | 0.293**<br>(0.120)   | 0.368***<br>(0.123)    | 0.236*<br>(0.122)    |
| Israel                          | 0.151<br>(0.113)         | 0.099<br>(0.068)          | -0.083<br>(0.116)    | -0.091<br>(0.117)      | -0.017<br>(0.119)    |
| Constant                        | -0.255<br>(0.289)        | -0.296*<br>(0.170)        | -0.553***<br>(0.108) | -0.563***<br>(0.096)   | -0.290**<br>(0.134)  |
| Observations                    | 292                      | 328                       | 328                  | 328                    | 328                  |
| R-squared                       | 0.309                    | 0.325                     | 0.082                | 0.092                  | 0.114                |

Robust standard errors in parentheses

\*\*\* p&lt;0.01, \*\* p&lt;0.05, \* p&lt;0.1

**Table A.4: Multilevel regression model of opposition party expressed sentiment**

|                                                                    | (1) Full model      |
|--------------------------------------------------------------------|---------------------|
| Interruption = 1                                                   | -0.185**<br>(0.031) |
| N words                                                            | -0.003**<br>(0.000) |
| Date                                                               | -0.166**<br>(0.017) |
| Date^2                                                             | -0.012<br>(0.019)   |
| Daily cases / 1mil                                                 | 0.001<br>(0.001)    |
| Daily deaths / 1mil                                                | 0.001<br>(0.002)    |
| Policy stringency                                                  | -0.000<br>(0.001)   |
| Ideological distance                                               | -0.056†<br>(0.033)  |
| Office experience                                                  | -0.016<br>(0.012)   |
| Party size                                                         | -0.030*<br>(0.012)  |
| Experience * Size                                                  | 0.003**<br>(0.001)  |
| Constant                                                           | 0.104<br>(0.142)    |
| Observations                                                       | 4,279               |
| Log likelihood                                                     | -4732.209           |
| AIC                                                                | 9494.417            |
| BIC                                                                | 9589.84             |
| Number of parties                                                  | 25                  |
| Number of speakers                                                 | 225                 |
| Random effects variance: party (estimate / std. err.)              | 0.029 / 0.015       |
| Random effects variance: speaker (estimate / std. err.)            | 0.054 / 0.012       |
| Random effects variance: residual (estimate / std. err.)           | 0.512 / .011        |
| Residual intraclass correlation: party (ICC / std. err.)           | 0.048 / 0.025       |
| Residual intraclass correlation: speaker   party (ICC / std. err.) | 0.138 / 0.025       |

Standard errors in parentheses

\*\* p&lt;0.01, \* p&lt;0.05, † p&lt;0.1
